# Supplementary material for: Repurposing of the Malaria Box for Babesia microti in mice identifies novel active scaffolds against piroplasmosis
Source: PubMed Central journal article supplement (PMC9487043; doi:10.1186/s13071-022-05430-4), 2022-09-19

A.

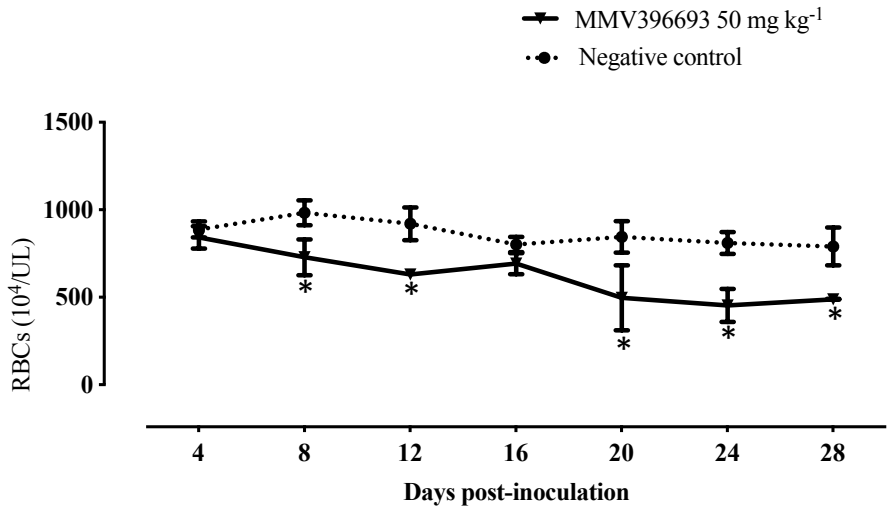

B.

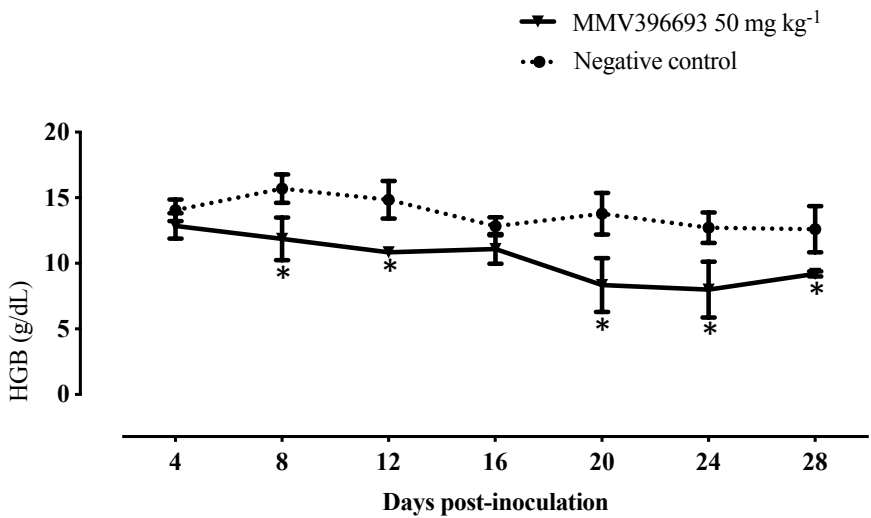

C.

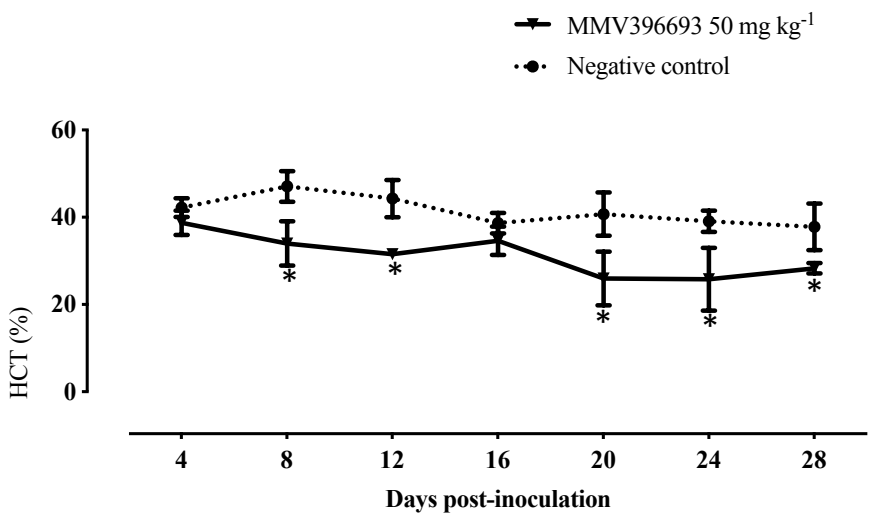

Supplement: 13071_2022_5430_MOESM1_ESM.pdf [file 13071_2022_5430_MOESM1_ESM.pdf]
